# Supplementary material for: Emulating the early phases of human tooth development in vitro
Source: PubMed Central journal article supplement (PMC6505527; doi:10.1038/s41598-019-43468-0), 2019-05-07
Supplement: 41598_2019_43468_MOESM1_ESM.pdf [file 41598_2019_43468_MOESM1_ESM.pdf]

1 **Emulating the early phases of human tooth development *in vitro***

2  
3 **Supplementary information**

4  
5  
6 Jennifer Rosowski<sup>1</sup>, Julia Bräunig<sup>1,2</sup>, Anna-Klara Amler<sup>1,3</sup>, Frank P. Strietzel<sup>4</sup>, Roland  
7 Lauster<sup>1</sup>, Mark Rosowski<sup>1,\*</sup>

8  
9  
10  
11 <sup>1</sup> Technische Universität Berlin, Institute of Biotechnology, Department Medical  
12 Biotechnology, Gustav-Meyer-Allee 25, 13355 Berlin, DE

13  
14 <sup>2</sup> Institute of Experimental Pediatric Endocrinology, Charité - Universitätsmedizin Berlin,  
15 Corporate Member of Freie Universität Berlin, Humboldt-Universität zu Berlin, and Berlin  
16 Institute of Health, Berlin, Germany.

17  
18 <sup>3</sup> Cellbricks GmbH, Gustav-Meyer-Allee 25, 13355 Berlin, DE

19  
20 <sup>4</sup> Charité · Charité Center for Dental, Oral, and Maxillary Medicine, Aßmannshauer Str.4-6  
21 14197 Berlin, DE

22  
23  
24  
25  
26  
27  
28 \*Corresponding author

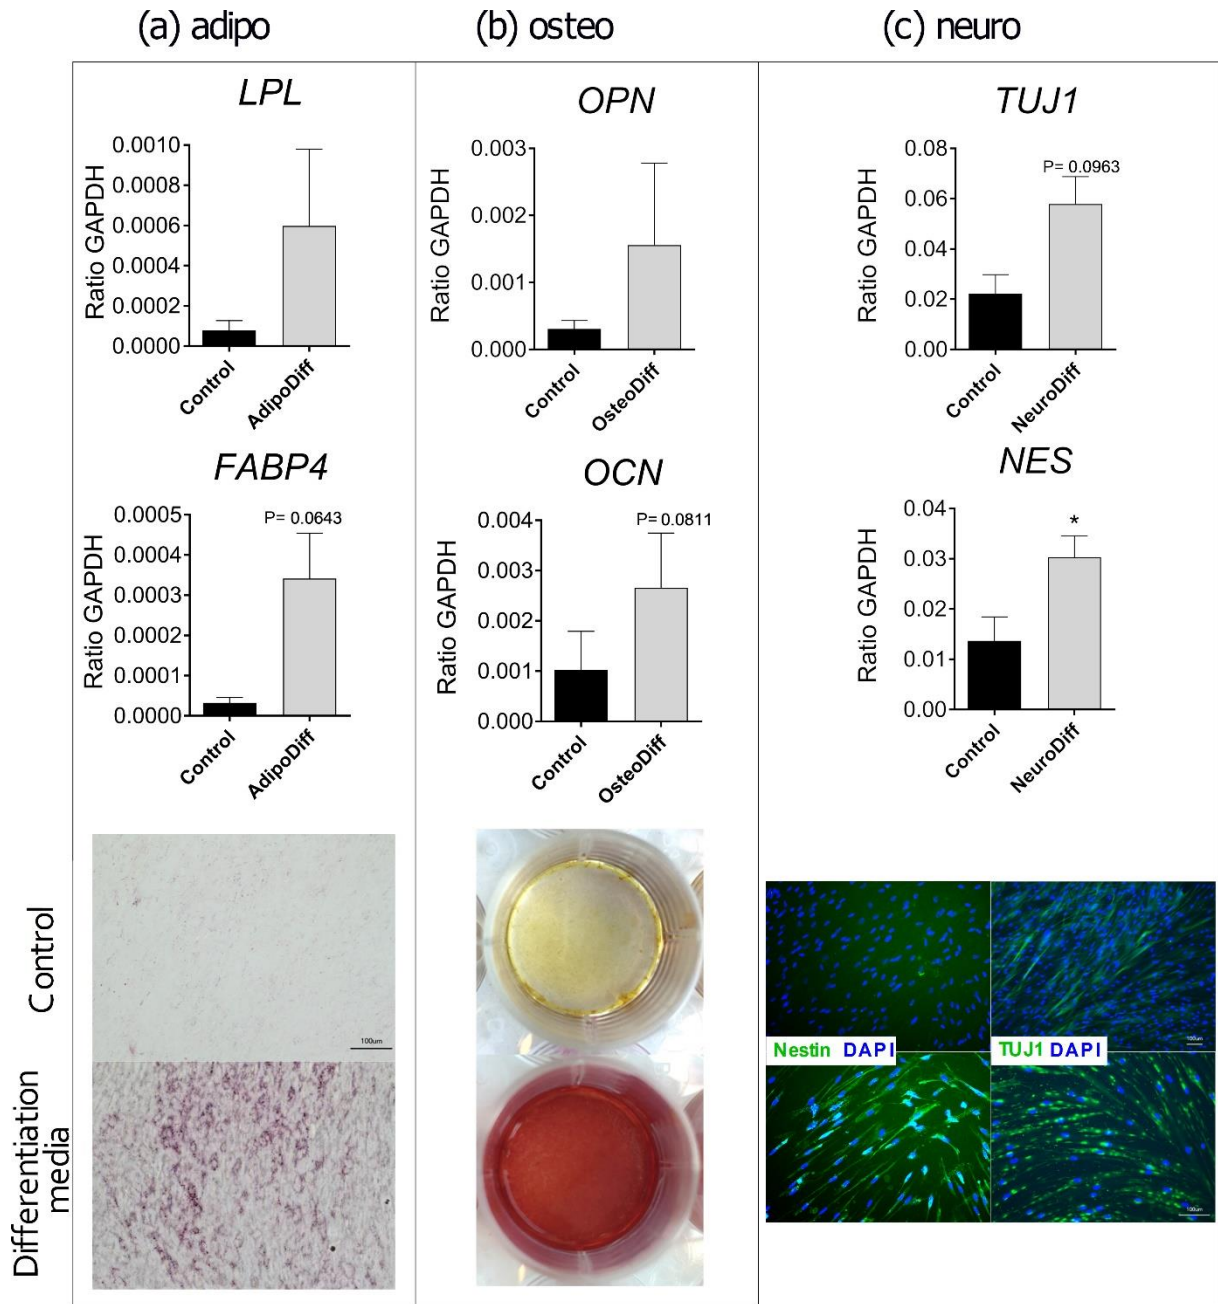

2

3 **Figure S1** Multipotent differentiation capacity of isolated DPCs is shown on transcriptional level of  
 4 selected marker genes for (a): adipogenic (FABP4, LPL), (b): osteogenic (OPN, OCN) and (c)  
 5 neurogenic (NES, TUJ1) lineage relative to GAPDH expression. On the lower panel of a, b and c,  
 6 differentiation was evidenced morphologically by staining of lipid vacuoles by Oil Red O for adipogenic  
 7 differentiated DPCs, staining of calcification by Alizarin Red Assay for osteogenic differentiation and  
 8 immunocytochemical staining of Nestin or Tuj1 for neurogenic differentiation. Control cells were cultured  
 9 under the same condition but with standard DMEM supplemented with 10% FCS and P/S. (N=5  
 10 biological replicates, \* P value < 0.05).

11

12

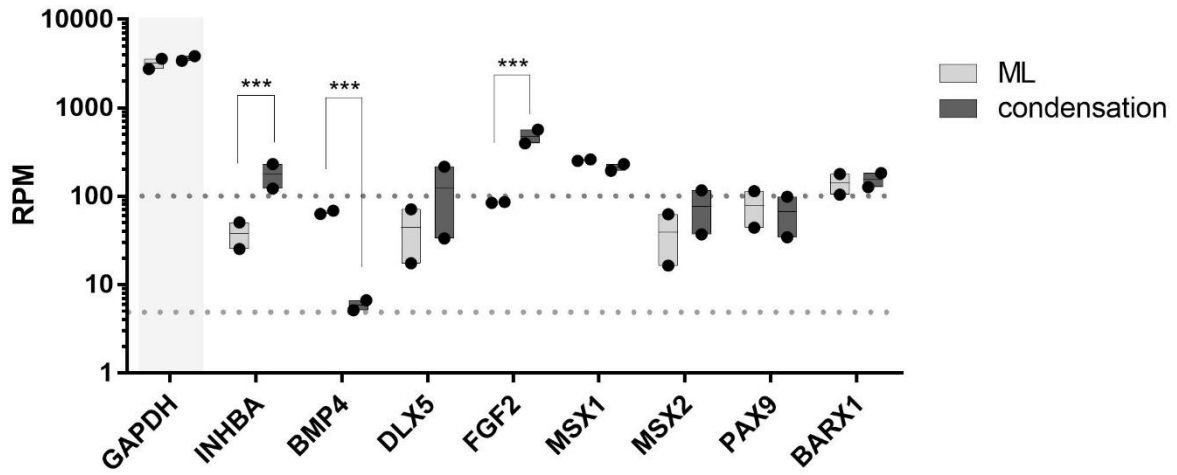

1

2 **Figure S2 Gene expression of selected marker genes for initiation phase** RPM values of tooth  
 3 initiation associated genes are depicted. Dashed line marks the level of high expressed genes  
 4 (RPM>100); dotted line marks the level of moderate expressed genes (RPM>5); [DESeq2 analysis: \*\*\*  
 5 P value < 0.001; \*\* P value < 0.01; \* P value < 0.05].

6

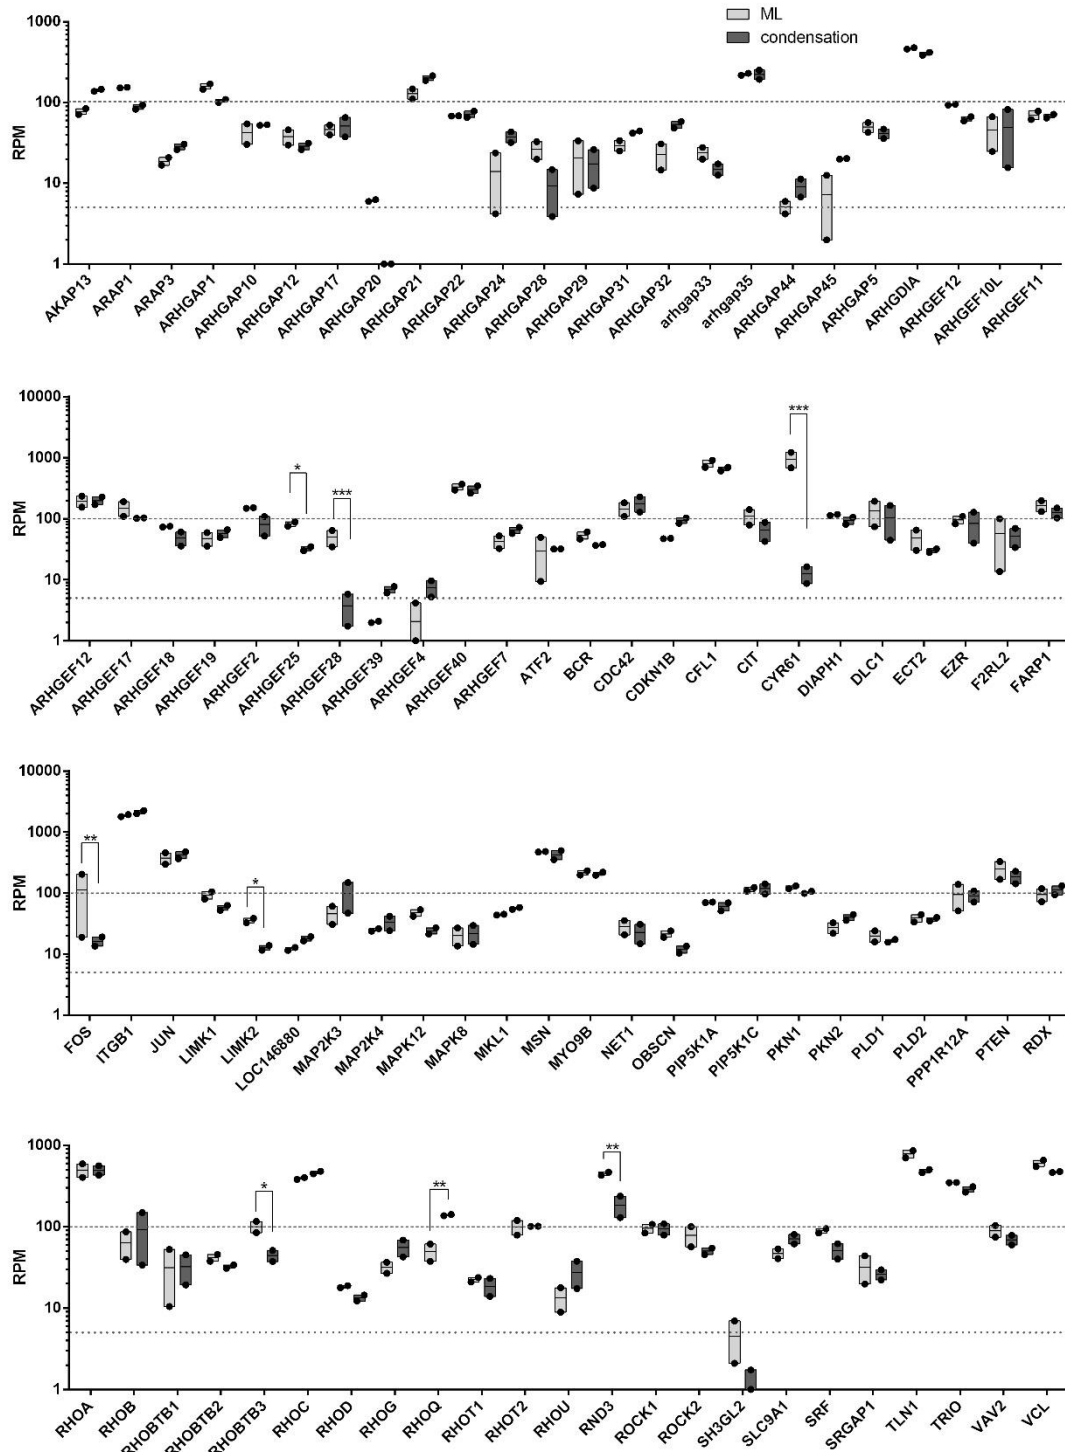

1

2 Figure S3. **RHOA signaling pathway** RPM values of RHOA transduction pathway associated genes  
 3 are depicted (see text for panel composition). The diagram is reduced to genes with at least moderate  
 4 gene expression level in the DPC condensation samples and the by genes with at least a two-fold  
 5 difference in the RPM values of both samples [95 genes]. Dashed line marks the level of high expressed  
 6 genes (RPM > 100); dotted line marks the level of moderate expressed genes (RPM > 5); [DESeq2  
 7 analysis: \*\*\* P value < 0.001; \*\* P value < 0.01; \* P value < 0.05].

8

table S1. Primer pairs used for qPCR

|           |                              |
|-----------|------------------------------|
| GAPDH up  | 5'TGTTGCCATCAATGACCCCTT      |
| GAPDH do  | 5'CTCCACGACGTA CT CAGCG      |
| BMP4 up   | 5'CGGGATCTTACCGGCTTC         |
| BMP4 do   | 5'TCTGCTGGGGGCTTCATAAC       |
| BMP7 up   | 5'ACTGTGAGGGGAGTGTGC         |
| BMP7 do   | 5'CGAAGTAGAGGACGGAGATGG      |
| INHBA up  | 5'GGGAGAACGGGTATGTGGAG       |
| INHBA do  | 5'CTGGAAGAGGCGGATGGT         |
| TGFβ1 up  | 5'CCTGGCGATACCTCAGCAAC       |
| TGFβ1 do  | 5'GCCATGAGAAGCAGGAAAGG       |
| FGF2 up   | 5'AGCGACCCTCACATCAAGC        |
| FGF2 do   | 5'GCCCAGTTCGTTTCAGTGC        |
| HGF up    | 5'GCCATGAATTTGACCTCTATGAAAAC |
| HGF do    | 5'TTTACCCCGATAGCTCGAAGG      |
| PAX9 up   | 5'CCTACCACAgCCCCAAGGT        |
| PAX9 do   | 5'AGCAACATAACCAGAAGGAGCAG    |
| MSX1 up   | 5'GAGAGGACCCCGTGGATG         |
| MSX1 do   | 5'CGATGGACAGGTA CT GCTTCTG   |
| DSPP up   | 5'GGCATTCCAGTTCCTCAA         |
| DSPP do   | 5'TGGGTATTCTCTTGCCTTCCTC     |
| COL1A1 up | 5'GCCGTGACCTCAAGATGTG        |
| COL1A1 do | 5'GCCGAACCAGACATGCCTC        |
| OPN up    | 5'CACTGATTTTCCCACGGACCT      |
| OPN do    | 5'CCATTCAACTCCTCGCTTTCC      |
| OCN up    | 5'CTCACACTCCTCGCCCTATTG      |
| OCN do    | 5'CTCCCAGCCATTGATACAGGTAG    |
| LPL up    | 5'GGCTGAAACTGGGCGAATCTAC     |
| LPL do    | 5'CGTTGGAGGATGTGCTATTTGG     |
| FABP4 up  | 5'GCAGAAATGGGATGGAAAATCA     |
| FABP4 do  | 5'CGTCCCTTGGCTTATGCTCTC      |
| Nestin up | 5'AGGCTGAGGGACATCTTGAGG      |
| Nestin do | 5'AGCGTTGGAACAGAGGTTGG       |
| TUJ1 up   | 5'CAGCAAGGTGCGTGAGGAG        |
| TUJ1 do   | 5'TGCGGAAGCAGATGTCTGTAG      |
| SDC up    | 5'GGGGAGCAGGACTTCACCT        |
| SDC do    | 5'TCCCAGCACCTCTTTCTGT        |
| TNC up    | 5'GGGACAGCAGGTGACTCCAT       |
| TNC do    | 5'TGTCCCCATATCTCCCCATC       |
| NCAM up   | 5'GTTCAAGCAACACCCCTCTT       |
| NCAM do   | 5'TTCTTCACCAACTGCTCTCCAC     |
| FN1 up    | 5'CAGACCTATCCAAGCTCAAGTGG    |
| FN1 do    | 5'TGGGTGGGATACTCACAGGTC      |

table S2. Antibodies for immunohistochemistry

| Antibody                          | Distributor          |
|-----------------------------------|----------------------|
| mouse anti-human Collagen type I  | Sigma C2456          |
| mouse anti-human Collagen type IV | Sigma C1926          |
| mouse anti-human Cytokeratin8/18  | Invitrogen MA5-14088 |
| rabbit anti-human Cytokeratin 15  | Abcam ab52816        |
| rabbit anti-human Vimentin        | Invitrogen PA5-27231 |

table S3. Differentially expressed genes between human DPCs in monolayer (ML) or six hours in condensation (6h) according to DESeq2 algorithm ( $|FC| \geq 1.5$ , nominal P value  $< 0.05$ ). Two biological replicates were performed. Upregulated genes are highlighted in red and downregulated in blue.

| GeneID    | Official Gene Symbol | Reads per Million (RPM) |              |         |              | log2 FoldChange | P value  | FDR adj. P-value |
|-----------|----------------------|-------------------------|--------------|---------|--------------|-----------------|----------|------------------|
|           |                      | ZZ29 ML                 | ZZ29 6h Cond | ZZ31 ML | ZZ31 6h Cond |                 |          |                  |
| 7043      | TGFB3                | 12,578                  | 397,953      | 0,000   | 330,028      | 3,891           | 9,00E-17 | 3,08E-13         |
| 2847      | MCHR1                | 0,000                   | 80,365       | 0,000   | 69,663       | 3,354           | 1,46E-11 | 3,00E-08         |
| 1909      | EDNRA                | 4,193                   | 110,381      | 0,000   | 82,725       | 3,241           | 2,41E-11 | 4,13E-08         |
| 50509     | COL5A3               | 129,977                 | 1572,446     | 97,270  | 1565,674     | 3,184           | 1,03E-17 | 5,28E-14         |
| 4071      | TM4SF1               | 28,301                  | 506,397      | 38,709  | 459,775      | 3,183           | 2,12E-16 | 5,45E-13         |
| 10221     | TRIB1                | 2,096                   | 71,651       | 5,955   | 102,753      | 2,909           | 1,32E-09 | 1,69E-06         |
| 57801     | HES4                 | 2,096                   | 50,349       | 2,978   | 82,725       | 2,836           | 9,45E-09 | 9,71E-06         |
| 54498     | SMOX                 | 102,723                 | 1222,906     | 45,657  | 560,787      | 2,670           | 2,56E-09 | 2,92E-06         |
| 4773      | NFATC2               | 2,096                   | 54,222       | 0,000   | 40,927       | 2,647           | 1,94E-07 | 9,80E-05         |
| 3400      | ID4                  | 29,350                  | 336,953      | 34,739  | 235,112      | 2,541           | 4,71E-10 | 6,92E-07         |
| 3696      | ITGB8                | 9,434                   | 63,905       | 7,940   | 146,292      | 2,480           | 1,37E-07 | 7,80E-05         |
| 84632     | AFAP1L2              | 8,386                   | 87,143       | 9,925   | 103,624      | 2,462           | 5,59E-08 | 4,10E-05         |
| 4741      | NEFM                 | 11,530                  | 152,016      | 3,970   | 62,697       | 2,453           | 5,48E-07 | 2,45E-04         |
| 3720      | JARID2               | 18,868                  | 151,048      | 13,896  | 141,938      | 2,427           | 1,69E-08 | 1,45E-05         |
| 57561     | ARRDC3               | 16,771                  | 172,349      | 34,739  | 271,685      | 2,417           | 1,46E-08 | 1,36E-05         |
| 8877      | SPHK1                | 44,024                  | 444,429      | 27,791  | 203,764      | 2,393           | 6,83E-08 | 4,68E-05         |
| 112399    | EGLN3                | 0,000                   | 20,333       | 1,985   | 69,663       | 2,374           | 4,66E-06 | 1,84E-03         |
| 5139      | PDE3A                | 2,096                   | 61,000       | 0,000   | 21,770       | 2,313           | 8,23E-06 | 2,68E-03         |
| 84959     | UBASH3B              | 15,723                  | 134,587      | 14,888  | 108,848      | 2,273           | 2,00E-07 | 9,80E-05         |
| 51129     | ANGPTL4              | 46,121                  | 509,302      | 8,933   | 148,034      | 2,240           | 7,20E-06 | 2,55E-03         |
| 6542      | SLC7A2               | 10,482                  | 45,508       | 11,911  | 191,573      | 2,211           | 6,05E-06 | 2,22E-03         |
| 56895     | AGPAT4               | 25,157                  | 119,095      | 12,903  | 168,933      | 2,174           | 9,14E-07 | 3,91E-04         |
| 340075    | ARSI                 | 0,000                   | 48,413       | 3,970   | 29,607       | 2,164           | 2,49E-05 | 6,40E-03         |
| 57471     | ERMN                 | 2,096                   | 26,143       | 0,000   | 37,444       | 2,162           | 3,01E-05 | 7,53E-03         |
| 6303      | SAT1                 | 71,277                  | 344,699      | 68,486  | 502,444      | 2,144           | 2,19E-08 | 1,73E-05         |
| 100499467 | LINC00673            | 8,386                   | 82,302       | 18,858  | 122,781      | 2,127           | 3,06E-06 | 1,26E-03         |
| 84935     | MEDAG                | 2,096                   | 118,127      | 0,000   | 6,966        | 2,119           | 5,23E-05 | 1,12E-02         |
| 2247      | FGF2                 | 85,952                  | 574,175      | 87,344  | 402,303      | 2,063           | 1,06E-07 | 6,71E-05         |
| 8835      | SOCS2                | 31,446                  | 168,476      | 10,918  | 136,713      | 2,053           | 7,52E-06 | 2,58E-03         |
| 9077      | DIRAS3               | 17,819                  | 114,254      | 1,985   | 80,983       | 2,040           | 4,43E-05 | 9,90E-03         |
| 23551     | RASD2                | 0,000                   | 6,778        | 1,985   | 94,916       | 2,039           | 9,95E-05 | 1,89E-02         |
| 26207     | PITPNC1              | 63,940                  | 316,619      | 58,560  | 350,927      | 2,025           | 1,11E-07 | 6,71E-05         |
| 9945      | GFPT2                | 13,627                  | 138,460      | 22,829  | 90,562       | 1,991           | 8,55E-06 | 2,68E-03         |
| 196740    | VSTM4                | 67,085                  | 367,937      | 33,747  | 233,371      | 1,969           | 5,71E-06 | 2,17E-03         |
| 643837    | LINC01128            | 12,578                  | 61,000       | 11,911  | 100,140      | 1,951           | 2,20E-05 | 5,81E-03         |
| 55326     | AGPAT5               | 6,289                   | 34,857       | 10,918  | 104,494      | 1,941           | 8,12E-05 | 1,66E-02         |
| 3754      | KCNF1                | 4,193                   | 29,048       | 3,970   | 47,022       | 1,910           | 1,58E-04 | 2,80E-02         |
| 84627     | ZNF469               | 54,506                  | 272,080      | 25,806  | 177,640      | 1,871           | 2,20E-05 | 5,81E-03         |
| 6615      | SNAI1                | 10,482                  | 66,810       | 8,933   | 54,860       | 1,845           | 9,32E-05 | 1,84E-02         |
| 392617    | ELFN1                | 11,530                  | 104,572      | 3,970   | 29,607       | 1,845           | 2,87E-04 | 4,46E-02         |
| 26508     | HEYL                 | 0,000                   | 14,524       | 0,000   | 28,736       | 1,819           | 5,17E-04 | 6,72E-02         |
| 5376      | PMP22                | 25,157                  | 170,413      | 27,791  | 97,528       | 1,787           | 4,66E-05 | 1,02E-02         |
| 25861     | WHRN                 | 19,916                  | 95,857       | 4,963   | 67,051       | 1,779           | 2,68E-04 | 4,38E-02         |
| 29923     | HILPDA               | 7,337                   | 52,286       | 10,918  | 55,730       | 1,768           | 2,06E-04 | 3,41E-02         |
| 1407      | CRY1                 | 6,289                   | 48,413       | 7,940   | 41,798       | 1,755           | 3,30E-04 | 4,91E-02         |
| 3280      | HES1                 | 4,193                   | 50,349       | 1,985   | 15,674       | 1,749           | 7,83E-04 | 9,46E-02         |
| 19        | ABCA1                | 50,314                  | 196,556      | 49,627  | 236,854      | 1,724           | 1,12E-05 | 3,19E-03         |
| 79870     | BAALC                | 30,398                  | 158,794      | 53,598  | 207,247      | 1,695           | 3,92E-05 | 9,15E-03         |
| 353500    | BMP8A                | 2,096                   | 21,302       | 4,963   | 38,315       | 1,688           | 1,07E-03 | 1,17E-01         |
| 10171     | RCL1                 | 6,289                   | 16,460       | 2,978   | 64,438       | 1,684           | 1,12E-03 | 1,20E-01         |
| 83716     | CRISPLD2             | 46,121                  | 296,286      | 13,896  | 72,275       | 1,663           | 8,54E-04 | 9,74E-02         |

|        |          |         |          |         |          |       |          |          |
|--------|----------|---------|----------|---------|----------|-------|----------|----------|
| 26353  | HSPB8    | 2,096   | 12,587   | 3,970   | 47,893   | 1,653 | 1,54E-03 | 1,52E-01 |
| 50700  | RDH8     | 0,000   | 17,429   | 0,000   | 17,416   | 1,636 | 1,78E-03 | 1,66E-01 |
| 3624   | INHBA    | 51,362  | 234,318  | 25,806  | 123,652  | 1,632 | 3,06E-04 | 4,69E-02 |
| 220323 | OAF      | 111,109 | 293,381  | 51,613  | 419,719  | 1,630 | 1,26E-04 | 2,27E-02 |
| 54541  | DDIT4    | 201,254 | 888,858  | 72,456  | 409,270  | 1,621 | 4,27E-04 | 5,93E-02 |
| 182    | JAG1     | 34,591  | 100,698  | 9,925   | 120,169  | 1,593 | 7,37E-04 | 9,12E-02 |
| 3554   | IL1R1    | 274,628 | 1098,001 | 386,102 | 1311,405 | 1,592 | 8,87E-06 | 2,68E-03 |
| 5054   | SERPINE1 | 801,872 | 2897,987 | 704,710 | 2586,236 | 1,583 | 9,80E-06 | 2,88E-03 |
| 9419   | CRIP1    | 0,000   | 19,365   | 1,985   | 17,416   | 1,577 | 2,61E-03 | 2,12E-01 |
| 169792 | GLIS3    | 50,314  | 175,254  | 8,933   | 137,584  | 1,574 | 1,25E-03 | 1,31E-01 |
| 3638   | INSIG1   | 17,819  | 139,429  | 17,866  | 40,056   | 1,571 | 1,28E-03 | 1,33E-01 |
| 387763 | C11ORF96 | 76,518  | 235,286  | 54,590  | 269,073  | 1,564 | 8,26E-05 | 1,66E-02 |
| 1942   | EFNA1    | 0,000   | 7,746    | 1,985   | 35,702   | 1,559 | 2,89E-03 | 2,23E-01 |
| 145581 | LRFN5    | 0,000   | 7,746    | 1,985   | 35,702   | 1,559 | 2,89E-03 | 2,23E-01 |
| 6932   | TCF7     | 37,735  | 93,921   | 30,769  | 194,185  | 1,558 | 3,58E-04 | 5,18E-02 |
| 8553   | BHLHE40  | 57,651  | 301,127  | 63,523  | 168,933  | 1,555 | 1,97E-04 | 3,33E-02 |
| 166647 | adgra3   | 50,314  | 161,699  | 48,635  | 215,084  | 1,553 | 9,85E-05 | 1,89E-02 |
| 1846   | DUSP4    | 9,434   | 68,746   | 3,970   | 19,157   | 1,540 | 2,78E-03 | 2,22E-01 |
| 284018 | C17orf58 | 5,241   | 38,730   | 9,925   | 40,056   | 1,539 | 1,84E-03 | 1,66E-01 |
| 4216   | MAP3K4   | 31,446  | 125,873  | 23,821  | 96,657   | 1,536 | 4,03E-04 | 5,75E-02 |
| 3775   | KCNK1    | 5,241   | 25,175   | 3,970   | 32,219   | 1,526 | 2,83E-03 | 2,22E-01 |
| 2012   | EMP1     | 462,255 | 2153,399 | 515,133 | 1311,405 | 1,523 | 7,24E-05 | 1,52E-02 |
| 7223   | TRPC4    | 0,000   | 21,302   | 5,955   | 30,478   | 1,514 | 3,62E-03 | 2,62E-01 |
| 7779   | SLC30A1  | 44,024  | 164,603  | 27,791  | 118,427  | 1,513 | 4,74E-04 | 6,40E-02 |
| 5163   | PDK1     | 18,868  | 53,254   | 24,814  | 134,972  | 1,503 | 1,16E-03 | 1,23E-01 |
| 8013   | NR4A3    | 13,627  | 74,556   | 1,985   | 26,994   | 1,498 | 3,73E-03 | 2,64E-01 |
| 83786  | FRMD8    | 68,133  | 337,921  | 64,516  | 162,837  | 1,496 | 4,82E-04 | 6,40E-02 |
| 26035  | GLCE     | 19,916  | 61,000   | 38,709  | 195,927  | 1,495 | 1,49E-03 | 1,49E-01 |
| 7378   | UPP1     | 11,530  | 62,937   | 3,970   | 25,253   | 1,483 | 3,61E-03 | 2,62E-01 |
| 9052   | GPRC5A   | 0,000   | 11,619   | 0,000   | 19,157   | 1,483 | 4,48E-03 | 2,90E-01 |
| 114088 | TRIM9    | 0,000   | 13,556   | 0,000   | 16,545   | 1,479 | 4,60E-03 | 2,95E-01 |
| 136    | ADORA2B  | 3,145   | 16,460   | 0,000   | 21,770   | 1,464 | 5,19E-03 | 3,15E-01 |
| 467    | ATF3     | 9,434   | 45,508   | 3,970   | 26,994   | 1,460 | 4,01E-03 | 2,75E-01 |
| 56937  | PMEP1    | 49,265  | 218,826  | 69,478  | 187,219  | 1,448 | 2,77E-04 | 4,44E-02 |
| 6424   | SFRP4    | 11,530  | 50,349   | 15,881  | 60,955   | 1,440 | 2,00E-03 | 1,76E-01 |
| 5142   | PDE4B    | 35,639  | 107,476  | 9,925   | 87,949   | 1,427 | 2,82E-03 | 2,22E-01 |
| 10184  | LHFPL2   | 47,169  | 152,016  | 68,486  | 244,691  | 1,420 | 4,86E-04 | 6,40E-02 |
| 6383   | SDC2     | 138,362 | 312,746  | 167,741 | 761,067  | 1,419 | 5,99E-04 | 7,65E-02 |
| 85463  | ZC3H12C  | 28,301  | 105,540  | 17,866  | 70,534   | 1,414 | 1,85E-03 | 1,66E-01 |
| 10579  | TACC2    | 13,627  | 61,000   | 7,940   | 34,831   | 1,413 | 3,99E-03 | 2,75E-01 |
| 54852  | PAQR5    | 10,482  | 38,730   | 22,829  | 102,753  | 1,410 | 3,50E-03 | 2,59E-01 |
| 23313  | KIAA0930 | 109,013 | 259,492  | 77,419  | 366,601  | 1,399 | 4,12E-04 | 5,79E-02 |
| 6095   | RORA     | 24,109  | 90,048   | 19,851  | 70,534   | 1,394 | 1,78E-03 | 1,66E-01 |
| 10560  | SLC19A2  | 2,096   | 16,460   | 2,978   | 20,899   | 1,392 | 7,80E-03 | 4,20E-01 |
| 29116  | MYLIP    | 8,386   | 46,476   | 17,866  | 57,472   | 1,379 | 3,79E-03 | 2,67E-01 |
| 94031  | HTRA3    | 95,386  | 194,619  | 98,262  | 470,225  | 1,376 | 1,04E-03 | 1,16E-01 |
| 23401  | FRAT2    | 3,145   | 28,079   | 0,000   | 9,579    | 1,369 | 8,91E-03 | 4,53E-01 |
| 23413  | NCS1     | 85,952  | 295,318  | 110,173 | 313,483  | 1,364 | 2,85E-04 | 4,46E-02 |
| 4291   | MLF1     | 0,000   | 21,302   | 5,955   | 22,640   | 1,351 | 9,69E-03 | 4,76E-01 |
| 7803   | PTP4A1   | 55,555  | 195,587  | 61,538  | 174,157  | 1,351 | 6,29E-04 | 7,88E-02 |
| 23254  | KAZN     | 16,771  | 40,667   | 10,918  | 67,921   | 1,346 | 4,71E-03 | 2,97E-01 |
| 6446   | SGK1     | 36,687  | 133,619  | 23,821  | 79,242   | 1,345 | 2,77E-03 | 2,22E-01 |
| 406    | ARNTL    | 4,193   | 39,698   | 9,925   | 25,253   | 1,344 | 8,06E-03 | 4,27E-01 |
| 80018  | NAA25    | 4,193   | 43,571   | 16,873  | 43,539   | 1,323 | 7,87E-03 | 4,21E-01 |
| 2903   | GRIN2A   | 0,000   | 24,206   | 0,000   | 5,225    | 1,323 | 1,04E-02 | 4,93E-01 |
| 687    | KLF9     | 41,928  | 115,222  | 26,799  | 111,461  | 1,314 | 2,27E-03 | 1,93E-01 |
| 9586   | CREB5    | 4,193   | 22,270   | 1,985   | 16,545   | 1,312 | 1,21E-02 | 5,31E-01 |
| 10570  | DPYSL4   | 16,771  | 50,349   | 27,791  | 106,236  | 1,301 | 4,83E-03 | 2,99E-01 |
| 23704  | KCNE4    | 6,289   | 57,127   | 0,000   | 5,225    | 1,300 | 1,28E-02 | 5,39E-01 |



|        |          |         |          |         |          |       |          |          |
|--------|----------|---------|----------|---------|----------|-------|----------|----------|
| 2114   | ETS2     | 41,928  | 143,302  | 6,948   | 67,051   | 1,299 | 9,76E-03 | 4,77E-01 |
| 153478 | PLEKHG4B | 0,000   | 22,270   | 7,940   | 26,994   | 1,298 | 1,28E-02 | 5,39E-01 |
| 51312  | SLC25A37 | 81,759  | 241,095  | 45,657  | 168,933  | 1,295 | 2,46E-03 | 2,07E-01 |
| 55     | ACPP     | 2,096   | 13,556   | 0,000   | 14,803   | 1,293 | 1,33E-02 | 5,49E-01 |
| 92104  | TTC30A   | 2,096   | 13,556   | 5,955   | 32,219   | 1,288 | 1,36E-02 | 5,59E-01 |
| 7090   | TLE3     | 26,205  | 99,730   | 42,680  | 114,944  | 1,280 | 2,58E-03 | 2,12E-01 |
| 57464  | STRIP2   | 4,193   | 21,302   | 3,970   | 20,899   | 1,278 | 1,38E-02 | 5,64E-01 |
| 89797  | NAV2     | 14,675  | 85,206   | 46,650  | 120,169  | 1,277 | 5,51E-03 | 3,26E-01 |
| 11138  | TBC1D8   | 40,880  | 117,159  | 15,881  | 80,983   | 1,271 | 6,41E-03 | 3,62E-01 |
| 10808  | HSPH1    | 81,759  | 288,540  | 76,426  | 184,607  | 1,270 | 1,79E-03 | 1,66E-01 |
| 85450  | ITPRIP   | 88,049  | 336,953  | 67,493  | 152,388  | 1,267 | 3,70E-03 | 2,64E-01 |
| 6591   | SNAI2    | 67,085  | 154,921  | 63,523  | 236,854  | 1,265 | 1,56E-03 | 1,52E-01 |
| 23462  | HEY1     | 0,000   | 5,810    | 0,000   | 20,899   | 1,260 | 1,45E-02 | 5,73E-01 |
| 64131  | XYLT1    | 95,386  | 297,254  | 112,158 | 290,843  | 1,253 | 8,47E-04 | 9,74E-02 |
| 84870  | RSPO3    | 2,096   | 30,984   | 0,000   | 3,483    | 1,246 | 1,58E-02 | 6,00E-01 |
| 5159   | PDGFRB   | 569,172 | 1950,065 | 515,133 | 1146,826 | 1,245 | 1,43E-03 | 1,45E-01 |
| 10758  | TRAF3IP2 | 25,157  | 94,889   | 9,925   | 37,444   | 1,239 | 1,22E-02 | 5,33E-01 |
| 51010  | EXOSC3   | 6,289   | 21,302   | 0,000   | 20,899   | 1,237 | 1,81E-02 | 6,44E-01 |
| 7042   | TGFB2    | 100,627 | 308,873  | 109,180 | 278,652  | 1,235 | 1,08E-03 | 1,17E-01 |
| 4783   | NFIL3    | 37,735  | 104,572  | 11,911  | 70,534   | 1,234 | 9,95E-03 | 4,84E-01 |
| 1956   | EGFR     | 78,615  | 245,937  | 45,657  | 138,455  | 1,233 | 4,88E-03 | 3,00E-01 |
| 24145  | PANX1    | 124,736 | 377,619  | 101,240 | 269,944  | 1,232 | 1,86E-03 | 1,66E-01 |
| 10397  | NDRG1    | 198,109 | 595,477  | 121,091 | 350,927  | 1,228 | 3,33E-03 | 2,51E-01 |
| 2774   | GNAL     | 2,096   | 5,810    | 0,000   | 24,382   | 1,226 | 1,82E-02 | 6,44E-01 |
| 23186  | RCOR1    | 25,157  | 62,937   | 27,791  | 101,882  | 1,225 | 5,49E-03 | 3,26E-01 |
| 3717   | JAK2     | 8,386   | 40,667   | 23,821  | 71,405   | 1,224 | 1,13E-02 | 5,17E-01 |
| 2300   | FOXL1    | 6,289   | 24,206   | 5,955   | 26,994   | 1,221 | 1,66E-02 | 6,13E-01 |
| 6515   | SLC2A3   | 25,157  | 119,095  | 44,665  | 89,691   | 1,221 | 5,06E-03 | 3,09E-01 |
| 57214  | CEMIP    | 271,483 | 908,223  | 98,262  | 324,803  | 1,219 | 9,64E-03 | 4,76E-01 |
| 84803  | GPAT3    | 0,000   | 14,524   | 0,000   | 8,708    | 1,218 | 1,82E-02 | 6,44E-01 |
| 55647  | RAB20    | 0,000   | 13,556   | 1,985   | 12,191   | 1,218 | 1,94E-02 | 6,63E-01 |
| 1832   | DSP      | 3,145   | 25,175   | 11,911  | 36,573   | 1,214 | 1,75E-02 | 6,28E-01 |
| 64651  | CSRNP1   | 12,578  | 65,841   | 18,858  | 38,315   | 1,207 | 1,14E-02 | 5,19E-01 |
| 25799  | ZNF324   | 4,193   | 19,365   | 0,993   | 13,933   | 1,204 | 2,15E-02 | 7,03E-01 |
| 23446  | SLC44A1  | 123,687 | 259,492  | 116,128 | 411,882  | 1,203 | 1,86E-03 | 1,66E-01 |
| 114880 | OSBPL6   | 2,096   | 22,270   | 7,940   | 23,511   | 1,198 | 2,10E-02 | 6,96E-01 |
| 85027  | SMIM3    | 34,591  | 138,460  | 44,665  | 91,433   | 1,197 | 5,23E-03 | 3,16E-01 |
| 55893  | ZNF395   | 85,952  | 177,191  | 101,240 | 357,893  | 1,194 | 3,40E-03 | 2,53E-01 |
| 6533   | SLC6A6   | 107,964 | 329,207  | 47,642  | 155,000  | 1,189 | 9,19E-03 | 4,61E-01 |
| 3570   | IL6R     | 11,530  | 53,254   | 2,978   | 14,803   | 1,188 | 2,24E-02 | 7,06E-01 |
| 23433  | RHOQ     | 37,735  | 141,365  | 61,538  | 136,713  | 1,188 | 3,91E-03 | 2,73E-01 |
| 4163   | MCC      | 49,265  | 129,746  | 38,709  | 121,910  | 1,188 | 4,25E-03 | 2,82E-01 |
| 57509  | MTUS1    | 0,000   | 12,587   | 0,000   | 9,579    | 1,185 | 2,14E-02 | NA       |
| 9700   | ESPL1    | 12,578  | 36,794   | 10,918  | 42,669   | 1,184 | 1,42E-02 | 5,70E-01 |
| 7539   | ZFP37    | 2,096   | 13,556   | 1,985   | 13,933   | 1,179 | 2,41E-02 | 7,43E-01 |
| 6197   | RPS6KA3  | 51,362  | 142,333  | 87,344  | 246,433  | 1,171 | 4,77E-03 | 2,97E-01 |
| 864    | RUNX3    | 56,603  | 169,445  | 48,635  | 124,522  | 1,170 | 4,77E-03 | 2,97E-01 |
| 201501 | ZBTB7C   | 0,000   | 15,492   | 0,000   | 6,966    | 1,169 | 2,28E-02 | NA       |
| 57596  | BEGAIN   | 0,000   | 10,651   | 1,985   | 13,933   | 1,168 | 2,46E-02 | 7,44E-01 |
| 481    | ATP1B1   | 8,386   | 23,238   | 8,933   | 39,185   | 1,154 | 2,11E-02 | 6,96E-01 |
| 2043   | EPHA4    | 10,482  | 29,048   | 25,806  | 95,787   | 1,154 | 1,95E-02 | 6,64E-01 |
| 8609   | KLF7     | 2,096   | 23,238   | 8,933   | 23,511   | 1,151 | 2,66E-02 | 7,80E-01 |
| 9695   | EDEM1    | 63,940  | 124,905  | 66,501  | 236,854  | 1,147 | 5,53E-03 | 3,26E-01 |
| 285958 | SNHG15   | 0,000   | 11,619   | 0,000   | 9,579    | 1,146 | 2,56E-02 | NA       |
| 80853  | KDM7A    | 4,193   | 23,238   | 11,911  | 36,573   | 1,143 | 2,46E-02 | 7,44E-01 |
| 8531   | YBX3     | 94,338  | 263,365  | 101,240 | 246,433  | 1,143 | 2,59E-03 | 2,12E-01 |
| 9394   | HS6ST1   | 104,820 | 287,572  | 61,538  | 177,640  | 1,140 | 7,68E-03 | 4,15E-01 |
| 6376   | CX3CL1   | 2,096   | 29,048   | 1,985   | 3,483    | 1,139 | 2,77E-02 | 7,93E-01 |
| 9261   | MAPKAPK2 | 187,627 | 461,858  | 159,800 | 438,006  | 1,138 | 2,24E-03 | 1,92E-01 |

|           |          |         |          |         |         |       |          |          |
|-----------|----------|---------|----------|---------|---------|-------|----------|----------|
| 9781      | RNF144A  | 14,675  | 68,746   | 62,531  | 175,899 | 1,134 | 1,92E-02 | 6,63E-01 |
| 114299    | PALM2    | 2,096   | 16,460   | 3,970   | 14,803  | 1,128 | 3,13E-02 | 8,38E-01 |
| 196527    | ANO6     | 76,518  | 267,238  | 129,031 | 261,236 | 1,122 | 4,10E-03 | 2,76E-01 |
| 57132     | CHMP1B   | 169,808 | 457,016  | 74,441  | 242,079 | 1,121 | 1,21E-02 | 5,31E-01 |
| 55818     | KDM3A    | 18,868  | 72,619   | 52,605  | 134,101 | 1,116 | 1,53E-02 | 5,89E-01 |
| 55197     | RPRD1A   | 19,916  | 52,286   | 14,888  | 51,376  | 1,116 | 1,65E-02 | 6,10E-01 |
| 285203    | EOGT     | 29,350  | 49,381   | 28,784  | 121,910 | 1,112 | 1,53E-02 | 5,89E-01 |
| 221830    | TWISTNB  | 20,964  | 62,937   | 22,829  | 60,955  | 1,111 | 1,33E-02 | 5,49E-01 |
| 171546    | SPTSSA   | 39,832  | 86,175   | 29,776  | 105,365 | 1,111 | 9,62E-03 | 4,76E-01 |
| 160760    | PPTC7    | 28,301  | 122,000  | 41,687  | 70,534  | 1,109 | 1,26E-02 | 5,39E-01 |
| 6792      | CDKL5    | 0,000   | 4,841    | 0,993   | 17,416  | 1,105 | 3,02E-02 | NA       |
| 283209    | PGM2L1   | 14,675  | 26,143   | 11,911  | 59,213  | 1,093 | 2,58E-02 | 7,65E-01 |
| 81792     | ADAMTS12 | 8,386   | 38,730   | 13,896  | 31,348  | 1,092 | 2,63E-02 | 7,74E-01 |
| 10123     | ARL4C    | 81,759  | 297,254  | 22,829  | 59,213  | 1,092 | 3,06E-02 | 8,28E-01 |
| 54910     | SEMA4C   | 63,940  | 239,159  | 57,568  | 94,045  | 1,091 | 1,52E-02 | 5,89E-01 |
| 6659      | SOX4     | 100,627 | 209,143  | 231,264 | 736,685 | 1,091 | 1,75E-02 | 6,28E-01 |
| 51582     | AZIN1    | 134,169 | 372,778  | 226,301 | 529,438 | 1,090 | 4,69E-03 | 2,97E-01 |
| 6482      | ST3GAL1  | 88,049  | 254,651  | 72,456  | 161,096 | 1,088 | 8,38E-03 | 4,35E-01 |
| 3589      | IL11     | 33,542  | 476,381  | 13,896  | 60,955  | 1,086 | 3,05E-02 | 8,28E-01 |
| 8808      | IL1RL2   | 0,000   | 9,683    | 3,970   | 19,157  | 1,086 | 3,78E-02 | 9,18E-01 |
| 56925     | LXN      | 12,578  | 23,238   | 26,799  | 107,978 | 1,085 | 3,03E-02 | 8,28E-01 |
| 84365     | NIFK     | 2,096   | 28,079   | 10,918  | 21,770  | 1,085 | 3,65E-02 | 9,10E-01 |
| 157506    | RDH10    | 109,013 | 289,508  | 295,780 | 829,860 | 1,080 | 1,71E-02 | 6,26E-01 |
| 10788     | IQGAP2   | 0,000   | 6,778    | 1,985   | 16,545  | 1,079 | 3,66E-02 | 9,10E-01 |
| 50640     | PNPLA8   | 16,771  | 62,937   | 24,814  | 52,247  | 1,076 | 1,88E-02 | 6,56E-01 |
| 83641     | FAM107B  | 41,928  | 161,699  | 63,523  | 108,848 | 1,074 | 1,10E-02 | 5,09E-01 |
| 3566      | IL4R     | 102,723 | 259,492  | 44,665  | 148,034 | 1,073 | 1,72E-02 | 6,27E-01 |
| 4007      | PRICKLE3 | 5,241   | 24,206   | 4,963   | 15,674  | 1,071 | 3,93E-02 | 9,33E-01 |
| 57181     | SLC39A10 | 2,096   | 19,365   | 13,896  | 40,927  | 1,068 | 3,93E-02 | 9,33E-01 |
| 1195      | CLK1     | 20,964  | 67,778   | 40,695  | 97,528  | 1,067 | 1,65E-02 | 6,10E-01 |
| 2150      | F2RL1    | 4,193   | 23,238   | 35,732  | 125,393 | 1,059 | 4,11E-02 | 9,45E-01 |
| 90627     | STARD13  | 73,374  | 196,556  | 104,218 | 237,725 | 1,057 | 6,35E-03 | 3,62E-01 |
| 2013      | EMP2     | 59,747  | 130,714  | 63,523  | 177,640 | 1,057 | 8,15E-03 | 4,27E-01 |
| 79656     | BEND5    | 0,000   | 5,810    | 1,985   | 17,416  | 1,056 | 4,02E-02 | 9,38E-01 |
| 3755      | KCNG1    | 14,675  | 39,698   | 21,836  | 62,697  | 1,051 | 2,47E-02 | 7,46E-01 |
| 57647     | DHX37    | 30,398  | 69,714   | 18,858  | 64,438  | 1,048 | 2,10E-02 | 6,96E-01 |
| 93145     | OLFM2    | 57,651  | 97,794   | 18,858  | 120,169 | 1,047 | 2,45E-02 | 7,44E-01 |
| 7074      | TIAM1    | 4,193   | 16,460   | 13,896  | 47,022  | 1,044 | 4,25E-02 | 9,52E-01 |
| 121642    | ALKBH2   | 4,193   | 11,619   | 1,985   | 18,287  | 1,043 | 4,66E-02 | 1,00E+00 |
| 5641      | LGMN     | 30,398  | 61,968   | 25,806  | 86,208  | 1,040 | 1,84E-02 | 6,51E-01 |
| 6781      | STC1     | 270,435 | 1834,843 | 38,709  | 792,416 | 1,039 | 4,08E-02 | 9,43E-01 |
| 10194     | TSHZ1    | 24,109  | 89,079   | 28,784  | 51,376  | 1,039 | 2,27E-02 | 7,09E-01 |
| 116987    | AGAP1    | 63,940  | 161,699  | 47,642  | 119,298 | 1,038 | 1,33E-02 | 5,49E-01 |
| 100133941 | CD24     | 4,193   | 1,937    | 8,933   | 69,663  | 1,037 | 4,70E-02 | 1,00E+00 |
| 10435     | CDC42EP2 | 12,578  | 51,318   | 1,985   | 11,320  | 1,036 | 4,78E-02 | 1,00E+00 |
| 6018      | RLF      | 12,578  | 27,111   | 13,896  | 51,376  | 1,036 | 3,34E-02 | 8,66E-01 |
| 254170    | FBXO33   | 15,723  | 48,413   | 12,903  | 33,961  | 1,036 | 3,16E-02 | 8,42E-01 |
| 30811     | HUNK     | 6,289   | 37,762   | 9,925   | 16,545  | 1,035 | 4,34E-02 | 9,65E-01 |
| 55422     | ZNF331   | 13,627  | 44,540   | 12,903  | 32,219  | 1,034 | 3,27E-02 | 8,58E-01 |
| 81831     | NETO2    | 13,627  | 11,619   | 11,911  | 80,112  | 1,033 | 4,50E-02 | 9,85E-01 |
| 54793     | KCTD9    | 36,687  | 129,746  | 54,590  | 96,657  | 1,030 | 1,50E-02 | 5,86E-01 |
| 56180     | MOSPD1   | 2,096   | 8,714    | 3,970   | 20,899  | 1,028 | 4,95E-02 | 1,00E+00 |
| 23268     | DNMBP    | 41,928  | 122,000  | 31,762  | 68,792  | 1,022 | 2,23E-02 | 7,06E-01 |
| 6461      | SHB      | 44,024  | 101,667  | 33,747  | 94,045  | 1,022 | 1,65E-02 | 6,10E-01 |
| 3269      | HRH1     | 14,675  | 34,857   | 3,970   | 27,865  | 1,021 | 4,56E-02 | 9,93E-01 |
| 153443    | SRFBP1   | 2,096   | 13,556   | 0,000   | 7,837   | 1,020 | 4,77E-02 | NA       |
| 3099      | HK2      | 63,940  | 225,603  | 68,486  | 105,365 | 1,020 | 1,91E-02 | 6,63E-01 |
| 164284    | APCDD1L  | 56,603  | 112,318  | 15,881  | 93,174  | 1,018 | 3,23E-02 | 8,50E-01 |
| 10116     | FEM1B    | 51,362  | 108,445  | 58,560  | 160,225 | 1,017 | 1,27E-02 | 5,39E-01 |

|        |            |         |          |         |          |       |          |          |
|--------|------------|---------|----------|---------|----------|-------|----------|----------|
| 83930  | STARD3NL   | 20,964  | 64,873   | 31,762  | 69,663   | 1,015 | 2,23E-02 | 7,06E-01 |
| 5128   | CDK17      | 16,771  | 65,841   | 30,769  | 57,472   | 1,014 | 2,63E-02 | 7,74E-01 |
| 10746  | MAP3K2     | 26,205  | 59,064   | 24,814  | 72,275   | 1,013 | 2,25E-02 | 7,06E-01 |
| 665    | BNIP3L     | 150,941 | 395,048  | 241,189 | 518,118  | 1,012 | 7,42E-03 | 4,04E-01 |
| 8819   | SAP30      | 9,434   | 38,730   | 15,881  | 33,090   | 1,009 | 3,86E-02 | 9,28E-01 |
| 2034   | EPAS1      | 420,327 | 1016,668 | 188,584 | 534,663  | 1,007 | 2,20E-02 | 7,06E-01 |
| 57597  | BAHCC1     | 98,531  | 267,238  | 108,188 | 215,955  | 1,007 | 9,07E-03 | 4,57E-01 |
| 8497   | PPFIA4     | 12,578  | 17,429   | 12,903  | 62,697   | 1,007 | 4,56E-02 | 9,93E-01 |
| 22856  | CHSY1      | 66,036  | 188,810  | 85,359  | 167,191  | 1,006 | 1,06E-02 | 4,98E-01 |
| 23132  | RAD54L2    | 16,771  | 67,778   | 30,769  | 54,860   | 1,005 | 2,81E-02 | 7,95E-01 |
| 79720  | VPS37B     | 44,024  | 116,191  | 48,635  | 106,236  | 0,999 | 1,53E-02 | 5,89E-01 |
| 5045   | FURIN      | 227,459 | 445,397  | 167,741 | 479,803  | 0,999 | 8,28E-03 | 4,32E-01 |
| 1130   | LYST       | 17,819  | 60,032   | 31,762  | 66,180   | 0,998 | 2,71E-02 | 7,84E-01 |
| 4088   | SMAD3      | 146,748 | 389,238  | 180,644 | 357,893  | 0,998 | 6,96E-03 | 3,86E-01 |
| 254531 | LPCAT4     | 16,771  | 45,508   | 32,754  | 84,466   | 0,995 | 3,21E-02 | 8,46E-01 |
| 6566   | SLC16A1    | 47,169  | 104,572  | 45,657  | 117,556  | 0,989 | 1,61E-02 | 6,04E-01 |
| 23235  | SIK2       | 68,133  | 127,810  | 42,680  | 142,809  | 0,989 | 1,85E-02 | 6,51E-01 |
| 64764  | CREB3L2    | 97,482  | 329,207  | 145,905 | 231,629  | 0,988 | 1,28E-02 | 5,39E-01 |
| 9587   | MAD2L1BP   | 22,012  | 35,825   | 6,948   | 50,506   | 0,986 | 4,72E-02 | 1,00E+00 |
| 23387  | SIK3       | 40,880  | 128,778  | 52,605  | 94,045   | 0,985 | 1,93E-02 | 6,63E-01 |
| 7422   | VEGFA      | 759,944 | 1595,684 | 474,438 | 1289,635 | 0,985 | 1,16E-02 | 5,20E-01 |
| 59277  | NTN4       | 29,350  | 76,492   | 26,799  | 62,697   | 0,980 | 2,69E-02 | 7,84E-01 |
| 55790  | CSGALNACT1 | 100,627 | 260,461  | 61,538  | 136,713  | 0,977 | 2,54E-02 | 7,59E-01 |
| 50999  | TMED5      | 42,976  | 122,000  | 43,672  | 85,337   | 0,977 | 2,18E-02 | 7,06E-01 |
| 4854   | NOTCH3     | 128,928 | 297,254  | 132,009 | 293,455  | 0,977 | 8,79E-03 | 4,52E-01 |
| 23516  | SLC39A14   | 263,098 | 602,254  | 105,210 | 325,674  | 0,975 | 2,97E-02 | 8,28E-01 |
| 6513   | SLC2A1     | 214,881 | 674,874  | 335,482 | 552,079  | 0,971 | 9,98E-03 | 4,84E-01 |
| 25963  | TMEM87A    | 60,795  | 129,746  | 55,583  | 141,067  | 0,968 | 1,60E-02 | 6,04E-01 |
| 6535   | SLC6A8     | 30,398  | 42,603   | 24,814  | 101,011  | 0,964 | 3,77E-02 | 9,18E-01 |
| 3732   | CD82       | 190,772 | 382,461  | 122,084 | 339,607  | 0,960 | 1,54E-02 | 5,89E-01 |
| 63893  | UBE2O      | 45,073  | 111,349  | 44,665  | 98,399   | 0,960 | 2,10E-02 | 6,96E-01 |
| 29969  | MDFIC      | 87,000  | 128,778  | 51,613  | 206,376  | 0,959 | 2,39E-02 | 7,39E-01 |
| 51186  | TCEAL9     | 68,133  | 183,968  | 95,285  | 183,736  | 0,956 | 1,44E-02 | 5,73E-01 |
| 8728   | ADAM19     | 26,205  | 91,984   | 81,389  | 172,416  | 0,951 | 3,80E-02 | 9,20E-01 |
| 23336  | SYNM       | 24,109  | 45,508   | 38,709  | 113,202  | 0,950 | 4,00E-02 | 9,38E-01 |
| 121260 | SLC15A4    | 36,687  | 90,048   | 33,747  | 74,017   | 0,931 | 3,12E-02 | 8,38E-01 |
| 286343 | LURAP1L    | 35,639  | 68,746   | 19,851  | 67,051   | 0,928 | 4,15E-02 | 9,45E-01 |
| 5069   | PAPPA      | 114,254 | 184,937  | 29,776  | 181,124  | 0,919 | 4,98E-02 | 1,00E+00 |
| 7461   | CLIP2      | 123,687 | 326,302  | 205,458 | 383,146  | 0,917 | 1,62E-02 | 6,06E-01 |
| 256987 | SERINC5    | 52,410  | 87,143   | 85,359  | 238,596  | 0,914 | 4,03E-02 | 9,38E-01 |
| 90     | ACVR1      | 81,759  | 160,730  | 79,404  | 192,444  | 0,912 | 1,92E-02 | 6,63E-01 |
| 131578 | LRRC15     | 81,759  | 134,587  | 77,419  | 221,180  | 0,911 | 2,38E-02 | 7,38E-01 |
| 7040   | TGFB1      | 343,809 | 583,858  | 264,018 | 735,815  | 0,910 | 1,46E-02 | 5,73E-01 |
| 490    | ATP2B1     | 47,169  | 119,095  | 34,739  | 70,534   | 0,904 | 4,17E-02 | 9,45E-01 |
| 483    | ATP1B3     | 83,856  | 172,349  | 76,426  | 175,899  | 0,902 | 2,11E-02 | 6,96E-01 |
| 9188   | DDX21      | 71,277  | 186,873  | 108,188 | 196,798  | 0,896 | 2,22E-02 | 7,06E-01 |
| 7035   | TFPI       | 83,856  | 144,270  | 41,687  | 141,938  | 0,887 | 4,01E-02 | 9,38E-01 |
| 3572   | IL6ST      | 626,823 | 883,048  | 482,379 | 1507,332 | 0,881 | 2,19E-02 | 7,06E-01 |
| 5209   | PFKFB3     | 163,519 | 416,350  | 140,942 | 236,854  | 0,878 | 3,12E-02 | 8,38E-01 |
| 10867  | TSPAN9     | 148,844 | 290,476  | 156,823 | 346,573  | 0,875 | 1,79E-02 | 6,40E-01 |
| 10458  | BAIAP2     | 37,735  | 68,746   | 30,769  | 84,466   | 0,871 | 4,48E-02 | 9,83E-01 |
| 23710  | GABARAPL1  | 87,000  | 190,746  | 78,411  | 156,742  | 0,859 | 3,06E-02 | 8,28E-01 |
| 205    | AK4        | 28,301  | 66,810   | 38,709  | 79,242   | 0,855 | 4,87E-02 | 1,00E+00 |
| 4814   | NINJ1      | 199,158 | 453,143  | 150,867 | 281,264  | 0,851 | 3,54E-02 | 8,99E-01 |
| 84255  | SLC37A3    | 32,494  | 77,460   | 41,687  | 81,854   | 0,850 | 4,65E-02 | 1,00E+00 |
| 60485  | SAV1       | 54,506  | 121,032  | 51,613  | 101,882  | 0,841 | 4,18E-02 | 9,45E-01 |
| 23541  | SEC14L2    | 38,783  | 75,524   | 36,724  | 86,208   | 0,839 | 4,90E-02 | 1,00E+00 |
| 57403  | RAB22A     | 34,591  | 97,794   | 50,620  | 81,854   | 0,837 | 4,96E-02 | 1,00E+00 |
| 55603  | FAM46A     | 75,470  | 148,143  | 103,225 | 219,438  | 0,833 | 3,54E-02 | 8,99E-01 |

|        |          |          |          |          |          |        |          |          |
|--------|----------|----------|----------|----------|----------|--------|----------|----------|
| 9689   | BZW1     | 105,868  | 156,857  | 101,240  | 275,169  | 0,831  | 3,79E-02 | 9,18E-01 |
| 5467   | PPARD    | 66,036   | 141,365  | 73,449   | 143,680  | 0,830  | 3,58E-02 | 8,99E-01 |
| 9804   | TOMM20   | 67,085   | 143,302  | 88,337   | 170,674  | 0,819  | 3,74E-02 | 9,18E-01 |
| 54477  | PLEKHA5  | 66,036   | 113,286  | 71,464   | 168,933  | 0,816  | 4,29E-02 | 9,57E-01 |
| 23481  | PES1     | 58,699   | 127,810  | 67,493   | 128,006  | 0,816  | 4,15E-02 | 9,45E-01 |
| 57003  | CCDC47   | 103,772  | 213,984  | 103,225  | 200,281  | 0,816  | 3,34E-02 | 8,66E-01 |
| 5151   | PDE8A    | 89,097   | 184,937  | 64,516   | 132,360  | 0,814  | 4,99E-02 | 1,00E+00 |
| 1910   | EDNRB    | 158,278  | 234,318  | 194,540  | 472,837  | 0,789  | 4,84E-02 | 1,00E+00 |
| 3091   | HIF1A    | 231,652  | 375,683  | 276,921  | 621,742  | 0,788  | 3,69E-02 | 9,15E-01 |
| 8662   | EIF3B    | 163,519  | 252,715  | 126,054  | 313,483  | 0,772  | 4,48E-02 | 9,83E-01 |
| 1983   | EIF5     | 132,073  | 289,508  | 153,845  | 256,011  | 0,771  | 4,04E-02 | 9,38E-01 |
| 7291   | TWIST1   | 115,302  | 224,635  | 111,165  | 208,989  | 0,762  | 4,61E-02 | 9,98E-01 |
| 23243  | ANKRD28  | 93,290   | 192,683  | 133,002  | 238,596  | 0,759  | 4,87E-02 | 1,00E+00 |
| 80381  | CD276    | 171,905  | 344,699  | 205,458  | 351,798  | 0,736  | 4,43E-02 | 9,81E-01 |
| 960    | CD44     | 933,945  | 1610,208 | 690,814  | 1421,995 | 0,733  | 4,85E-02 | 1,00E+00 |
| 966    | CD59     | 538,774  | 1139,636 | 723,568  | 1141,601 | 0,723  | 4,11E-02 | 9,45E-01 |
| 7162   | TPBG     | 263,098  | 177,191  | 325,556  | 147,163  | -0,745 | 4,80E-02 | 1,00E+00 |
| 2316   | FLNA     | 3367,861 | 2115,637 | 4362,253 | 2223,989 | -0,750 | 3,05E-02 | 8,28E-01 |
| 56731  | SLC2A4RG | 160,374  | 89,079   | 166,748  | 87,949   | -0,766 | 4,83E-02 | 1,00E+00 |
| 57674  | RNF213   | 448,629  | 243,032  | 329,526  | 166,320  | -0,793 | 4,61E-02 | 9,98E-01 |
| 4641   | MYO1C    | 488,460  | 295,318  | 571,708  | 270,815  | -0,801 | 2,64E-02 | 7,74E-01 |
| 283078 | MKX      | 105,868  | 48,413   | 124,069  | 69,663   | -0,811 | 4,71E-02 | 1,00E+00 |
| 440275 | EIF2AK4  | 114,254  | 68,746   | 145,905  | 64,438   | -0,813 | 4,24E-02 | 9,51E-01 |
| 8573   | CASK     | 99,579   | 43,571   | 120,098  | 67,921   | -0,818 | 4,81E-02 | 1,00E+00 |
| 254102 | EHBP1L1  | 278,821  | 148,143  | 282,876  | 146,292  | -0,821 | 2,73E-02 | 7,84E-01 |
| 80332  | ADAM33   | 132,073  | 68,746   | 135,979  | 68,792   | -0,821 | 3,85E-02 | 9,28E-01 |
| 6938   | TCF12    | 166,664  | 91,984   | 212,405  | 103,624  | -0,824 | 3,18E-02 | 8,45E-01 |
| 311    | ANXA11   | 287,206  | 162,667  | 266,003  | 120,169  | -0,832 | 3,19E-02 | 8,46E-01 |
| 5156   | PDGFRA   | 896,210  | 523,826  | 1184,111 | 559,045  | -0,839 | 1,75E-02 | 6,28E-01 |
| 8476   | CDC42BPA | 100,627  | 64,873   | 162,778  | 65,309   | -0,839 | 3,98E-02 | 9,38E-01 |
| 142    | PARP1    | 123,687  | 70,683   | 141,934  | 61,826   | -0,845 | 3,48E-02 | 8,91E-01 |
| 122953 | JDP2     | 113,205  | 51,318   | 99,255   | 53,989   | -0,850 | 3,89E-02 | 9,29E-01 |
| 10512  | SEMA3C   | 337,520  | 187,841  | 245,160  | 94,045   | -0,851 | 4,47E-02 | 9,83E-01 |
| 59     | ACTA2    | 67,085   | 28,079   | 63,523   | 33,961   | -0,860 | 4,95E-02 | 1,00E+00 |
| 152503 | SH3D19   | 118,446  | 61,968   | 111,165  | 49,635   | -0,865 | 3,58E-02 | 8,99E-01 |
| 3667   | IRS1     | 244,230  | 118,127  | 278,906  | 145,421  | -0,869 | 2,01E-02 | 6,74E-01 |
| 5865   | RAB3B    | 126,832  | 75,524   | 181,636  | 74,888   | -0,872 | 2,80E-02 | 7,95E-01 |
| 1848   | DUSP6    | 140,459  | 86,175   | 313,645  | 128,876  | -0,874 | 3,71E-02 | 9,15E-01 |
| 57060  | PCBP4    | 89,097   | 31,952   | 153,845  | 79,242   | -0,887 | 4,64E-02 | 1,00E+00 |
| 71     | ACTG1    | 2637,267 | 1092,191 | 4142,899 | 2222,247 | -0,888 | 2,40E-02 | 7,39E-01 |
| 23264  | ZC3H7B   | 515,714  | 301,127  | 638,209  | 271,685  | -0,889 | 1,40E-02 | 5,68E-01 |
| 4141   | MARS     | 174,001  | 88,111   | 133,002  | 56,601   | -0,892 | 3,33E-02 | 8,66E-01 |
| 115207 | KCTD12   | 535,629  | 275,953  | 968,728  | 450,197  | -0,895 | 2,22E-02 | 7,06E-01 |
| 64780  | MICAL1   | 81,759   | 27,111   | 113,151  | 61,826   | -0,900 | 4,15E-02 | 9,45E-01 |
| 23211  | ZC3H4    | 47,169   | 19,365   | 63,523   | 29,607   | -0,903 | 4,69E-02 | 1,00E+00 |
| 81603  | TRIM8    | 268,339  | 125,873  | 279,899  | 141,938  | -0,910 | 1,44E-02 | 5,73E-01 |
| 3275   | PRMT2    | 136,266  | 77,460   | 157,815  | 60,955   | -0,911 | 2,32E-02 | 7,23E-01 |
| 51564  | HDAC7    | 123,687  | 64,873   | 181,636  | 79,242   | -0,912 | 2,24E-02 | 7,06E-01 |
| 678    | ZFP36L2  | 138,362  | 77,460   | 146,897  | 55,730   | -0,913 | 2,48E-02 | 7,46E-01 |
| 23576  | DDAH1    | 53,458   | 34,857   | 173,696  | 60,955   | -0,914 | 4,91E-02 | 1,00E+00 |
| 440    | ASNS     | 33,542   | 17,429   | 50,620   | 17,416   | -0,925 | 5,00E-02 | 1,00E+00 |
| 400550 | FENDRR   | 143,603  | 84,238   | 226,301  | 87,949   | -0,928 | 1,89E-02 | 6,58E-01 |
| 54862  | CC2D1A   | 46,121   | 14,524   | 36,724   | 20,028   | -0,930 | 4,97E-02 | 1,00E+00 |
| 1841   | DTYMK    | 56,603   | 22,270   | 42,680   | 20,028   | -0,931 | 4,43E-02 | 9,81E-01 |
| 221    | ALDH3B1  | 95,386   | 30,984   | 35,732   | 22,640   | -0,941 | 5,00E-02 | 1,00E+00 |
| 16     | AARS     | 210,688  | 91,984   | 146,897  | 72,275   | -0,942 | 2,17E-02 | 7,06E-01 |
| 51115  | RMDN1    | 48,217   | 23,238   | 57,568   | 21,770   | -0,942 | 3,77E-02 | 9,18E-01 |
| 22836  | RHOBTB3  | 84,904   | 51,318   | 116,128  | 37,444   | -0,947 | 2,57E-02 | 7,65E-01 |
| 26227  | PHGDH    | 107,964  | 40,667   | 89,329   | 47,893   | -0,957 | 2,25E-02 | 7,06E-01 |

|        |           |         |         |         |         |        |          |          |
|--------|-----------|---------|---------|---------|---------|--------|----------|----------|
| 4171   | MCM2      | 85,952  | 28,079  | 35,732  | 20,899  | -0,960 | 4,46E-02 | 9,83E-01 |
| 1969   | EPHA2     | 89,097  | 55,191  | 149,875 | 49,635  | -0,962 | 2,15E-02 | 7,03E-01 |
| 64859  | NABP1     | 50,314  | 36,794  | 151,860 | 45,281  | -0,963 | 3,57E-02 | 8,99E-01 |
| 7402   | UTRN      | 76,518  | 40,667  | 259,055 | 94,045  | -0,964 | 3,91E-02 | 9,32E-01 |
| 81563  | C1ORF21   | 37,735  | 26,143  | 86,352  | 23,511  | -0,966 | 3,75E-02 | 9,18E-01 |
| 9400   | RECQL5    | 29,350  | 13,556  | 36,724  | 11,320  | -0,973 | 4,61E-02 | 9,98E-01 |
| 8989   | TRPA1     | 101,675 | 43,571  | 61,538  | 23,511  | -0,974 | 3,40E-02 | 8,77E-01 |
| 152573 | SHISA3    | 0,000   | 0,000   | 20,844  | 0,000   | -0,976 | 4,77E-02 | NA       |
| 5921   | RASA1     | 105,868 | 56,159  | 213,398 | 81,854  | -0,978 | 2,02E-02 | 6,75E-01 |
| 653513 | LOC653513 | 14,675  | 0,000   | 2,978   | 0,000   | -0,979 | 4,94E-02 | NA       |
| 359845 | RFLNB     | 95,386  | 54,222  | 288,832 | 102,753 | -0,979 | 3,03E-02 | 8,28E-01 |
| 388650 | FAM69A    | 57,651  | 30,016  | 67,493  | 21,770  | -0,980 | 2,89E-02 | 8,12E-01 |
| 114876 | OSBPL1A   | 45,073  | 21,302  | 66,501  | 24,382  | -0,981 | 3,06E-02 | 8,28E-01 |
| 11234  | HPS5      | 37,735  | 15,492  | 28,784  | 8,708   | -0,984 | 4,68E-02 | 1,00E+00 |
| 54858  | PGPEP1    | 27,253  | 11,619  | 41,687  | 13,933  | -0,991 | 4,18E-02 | 9,45E-01 |
| 29028  | ATAD2     | 36,687  | 23,238  | 68,486  | 17,416  | -0,995 | 3,38E-02 | 8,72E-01 |
| 23179  | RGL1      | 79,663  | 18,397  | 54,590  | 36,573  | -0,995 | 3,05E-02 | 8,28E-01 |
| 55619  | DOCK10    | 58,699  | 24,206  | 95,285  | 39,185  | -0,999 | 2,43E-02 | 7,44E-01 |
| 93627  | TBCK      | 16,771  | 5,810   | 41,687  | 13,062  | -1,003 | 4,92E-02 | 1,00E+00 |
| 523    | ATP6V1A   | 71,277  | 43,571  | 136,972 | 42,669  | -1,004 | 1,97E-02 | 6,64E-01 |
| 79924  | adm2      | 13,627  | 0,000   | 3,970   | 0,000   | -1,005 | 4,49E-02 | NA       |
| 134957 | STXBP5    | 40,880  | 22,270  | 47,642  | 10,449  | -1,005 | 3,70E-02 | 9,15E-01 |
| 55901  | THSD1     | 4,193   | 0,000   | 13,896  | 0,000   | -1,008 | 4,46E-02 | NA       |
| 84162  | KIAA1109  | 89,097  | 42,603  | 127,046 | 49,635  | -1,008 | 1,50E-02 | 5,86E-01 |
| 727800 | RNF208    | 14,675  | 0,968   | 4,963   | 1,742   | -1,009 | 4,79E-02 | NA       |
| 64770  | CCDC14    | 42,976  | 15,492  | 58,560  | 24,382  | -1,009 | 2,92E-02 | 8,21E-01 |
| 6563   | SLC14A1   | 340,664 | 131,683 | 117,121 | 34,831  | -1,011 | 3,88E-02 | 9,29E-01 |
| 10827  | FAM114A2  | 20,964  | 7,746   | 24,814  | 6,966   | -1,013 | 4,69E-02 | 1,00E+00 |
| 4013   | VWA5A     | 75,470  | 28,079  | 248,137 | 92,303  | -1,014 | 3,42E-02 | 8,79E-01 |
| 81493  | SYNC      | 72,326  | 21,302  | 25,806  | 13,933  | -1,015 | 4,02E-02 | 9,38E-01 |
| 79885  | HDAC11    | 28,301  | 1,937   | 27,791  | 14,803  | -1,020 | 4,89E-02 | 1,00E+00 |
| 3516   | RBPJ      | 171,905 | 63,905  | 260,048 | 121,039 | -1,020 | 1,27E-02 | 5,39E-01 |
| 10602  | CDC42EP3  | 59,747  | 42,603  | 126,054 | 30,478  | -1,021 | 2,25E-02 | 7,06E-01 |
| 54532  | USP53     | 27,253  | 11,619  | 63,523  | 20,899  | -1,022 | 3,56E-02 | 8,99E-01 |
| 79690  | GAL3ST4   | 25,157  | 7,746   | 28,784  | 10,449  | -1,025 | 4,07E-02 | 9,43E-01 |
| 79890  | RIN3      | 32,494  | 7,746   | 21,836  | 10,449  | -1,027 | 4,15E-02 | 9,45E-01 |
| 388963 | C2ORF81   | 12,578  | 1,937   | 12,903  | 3,483   | -1,028 | 4,94E-02 | 1,00E+00 |
| 374393 | FAM111B   | 25,157  | 2,905   | 11,911  | 6,966   | -1,030 | 4,88E-02 | 1,00E+00 |
| 2139   | EYA2      | 19,916  | 5,810   | 38,709  | 13,062  | -1,032 | 4,16E-02 | 9,45E-01 |
| 5860   | QDPR      | 42,976  | 11,619  | 31,762  | 15,674  | -1,032 | 3,29E-02 | 8,60E-01 |
| 421    | ARVCF     | 4,193   | 3,873   | 32,754  | 3,483   | -1,033 | 4,83E-02 | 1,00E+00 |
| 64388  | GREM2     | 319,700 | 150,079 | 186,599 | 26,124  | -1,033 | 3,53E-02 | 8,99E-01 |
| 55103  | RALGPS2   | 30,398  | 10,651  | 88,337  | 30,478  | -1,033 | 3,59E-02 | 9,01E-01 |
| 6574   | SLC20A1   | 278,821 | 114,254 | 162,778 | 67,051  | -1,037 | 1,61E-02 | 6,04E-01 |
| 25802  | LMOD1     | 12,578  | 3,873   | 44,665  | 12,191  | -1,038 | 4,53E-02 | 9,91E-01 |
| 154091 | SLC2A12   | 10,482  | 0,968   | 6,948   | 0,000   | -1,042 | 3,93E-02 | NA       |
| 5257   | PHKB      | 40,880  | 11,619  | 51,613  | 22,640  | -1,045 | 2,73E-02 | 7,85E-01 |
| 221895 | JAZF1     | 11,530  | 7,746   | 54,590  | 11,320  | -1,046 | 4,23E-02 | 9,51E-01 |
| 6773   | STAT2     | 278,821 | 99,730  | 154,838 | 80,983  | -1,046 | 1,29E-02 | 5,39E-01 |
| 83660  | TLN2      | 58,699  | 20,333  | 158,808 | 59,213  | -1,048 | 2,72E-02 | 7,84E-01 |
| 6935   | ZEB1      | 124,736 | 57,127  | 248,137 | 94,916  | -1,048 | 1,29E-02 | 5,39E-01 |
| 3985   | LIMK2     | 38,783  | 11,619  | 32,754  | 13,933  | -1,048 | 3,04E-02 | 8,28E-01 |
| 57484  | RNF150    | 46,121  | 20,333  | 59,553  | 20,028  | -1,050 | 2,16E-02 | 7,03E-01 |
| 23536  | ADAT1     | 24,109  | 5,810   | 20,844  | 7,837   | -1,054 | 3,95E-02 | 9,34E-01 |
| 6742   | SSBP1     | 18,868  | 3,873   | 15,881  | 5,225   | -1,059 | 4,21E-02 | 9,49E-01 |
| 5905   | RANGAP1   | 286,158 | 126,841 | 326,549 | 137,584 | -1,061 | 4,13E-03 | 2,76E-01 |
| 5063   | PAK3      | 22,012  | 1,937   | 11,911  | 6,096   | -1,062 | 4,26E-02 | 9,52E-01 |
| 79960  | JADE1     | 47,169  | 12,587  | 86,352  | 35,702  | -1,064 | 2,51E-02 | 7,52E-01 |
| 330    | BIRC3     | 94,338  | 32,921  | 34,739  | 5,225   | -1,066 | 3,76E-02 | 9,18E-01 |

|        |           |          |          |          |          |        |          |          |
|--------|-----------|----------|----------|----------|----------|--------|----------|----------|
| 85379  | KIAA1671  | 25,157   | 6,778    | 11,911   | 1,742    | -1,067 | 4,17E-02 | 9,45E-01 |
| 80169  | CTC1      | 6,289    | 0,968    | 20,844   | 3,483    | -1,067 | 4,01E-02 | 9,38E-01 |
| 390    | RND3      | 469,593  | 237,222  | 428,781  | 129,747  | -1,071 | 8,12E-03 | 4,27E-01 |
| 144363 | ETFRF1    | 4,193    | 1,937    | 21,836   | 1,742    | -1,073 | 3,78E-02 | 9,18E-01 |
| 114796 | PSMG3-AS1 | 20,964   | 6,778    | 17,866   | 3,483    | -1,074 | 3,88E-02 | 9,29E-01 |
| 9569   | GTF2IRD1  | 52,410   | 12,587   | 28,784   | 15,674   | -1,075 | 2,72E-02 | 7,84E-01 |
| 11046  | SLC35D2   | 13,627   | 7,746    | 49,627   | 10,449   | -1,077 | 3,53E-02 | 8,99E-01 |
| 2825   | GPR1      | 23,060   | 7,746    | 27,791   | 7,837    | -1,083 | 3,21E-02 | 8,46E-01 |
| 9577   | BRE       | 16,771   | 5,810    | 23,821   | 5,225    | -1,084 | 3,61E-02 | 9,01E-01 |
| 115557 | ARHGEF25  | 89,097   | 30,016   | 75,434   | 34,831   | -1,084 | 1,19E-02 | 5,27E-01 |
| 862    | RUNX1T1   | 8,386    | 0,000    | 9,925    | 0,000    | -1,085 | 3,28E-02 | NA       |
| 5783   | PTPN13    | 159,326  | 81,333   | 262,033  | 90,562   | -1,085 | 6,04E-03 | 3,46E-01 |
| 91624  | NEXN      | 23,060   | 11,619   | 88,337   | 23,511   | -1,091 | 2,83E-02 | 7,98E-01 |
| 219285 | SAMD9L    | 78,615   | 31,952   | 54,590   | 15,674   | -1,094 | 1,95E-02 | 6,64E-01 |
| 10669  | CGREF1    | 14,675   | 1,937    | 6,948    | 0,000    | -1,094 | 3,36E-02 | NA       |
| 84939  | MUM1      | 81,759   | 22,270   | 88,337   | 42,669   | -1,105 | 1,19E-02 | 5,27E-01 |
| 60686  | C14ORF93  | 10,482   | 2,905    | 15,881   | 1,742    | -1,112 | 3,35E-02 | 8,68E-01 |
| 388115 | C15orf52  | 56,603   | 22,270   | 35,732   | 4,354    | -1,117 | 2,80E-02 | 7,95E-01 |
| 57523  | NYNRIN    | 37,735   | 15,492   | 52,605   | 15,674   | -1,117 | 1,75E-02 | 6,28E-01 |
| 6339   | SCNN1D    | 15,723   | 0,000    | 15,881   | 5,225    | -1,124 | 3,20E-02 | 8,46E-01 |
| 55793  | FAM63A    | 20,964   | 5,810    | 18,858   | 4,354    | -1,125 | 3,00E-02 | 8,28E-01 |
| 84795  | PYROXD2   | 29,350   | 3,873    | 34,739   | 14,803   | -1,128 | 2,61E-02 | 7,72E-01 |
| 55614  | KIF16B    | 16,771   | 6,778    | 21,836   | 1,742    | -1,129 | 3,08E-02 | 8,30E-01 |
| 29128  | UHRF1     | 59,747   | 12,587   | 48,635   | 25,253   | -1,131 | 1,58E-02 | 6,00E-01 |
| 2027   | ENO3      | 12,578   | 0,000    | 6,948    | 0,000    | -1,132 | 2,63E-02 | NA       |
| 23051  | ZHX3      | 98,531   | 44,540   | 114,143  | 36,573   | -1,133 | 6,68E-03 | 3,73E-01 |
| 55388  | MCM10     | 19,916   | 4,841    | 11,911   | 0,000    | -1,134 | 3,03E-02 | 8,28E-01 |
| 4061   | LY6E      | 32,494   | 11,619   | 23,821   | 0,871    | -1,135 | 2,99E-02 | 8,28E-01 |
| 7791   | ZYX       | 236,893  | 98,762   | 353,347  | 135,843  | -1,139 | 3,10E-03 | 2,38E-01 |
| 596    | BCL2      | 14,675   | 1,937    | 13,896   | 3,483    | -1,139 | 2,97E-02 | 8,28E-01 |
| 5021   | OXTR      | 19,916   | 1,937    | 5,955    | 1,742    | -1,140 | 2,81E-02 | 7,95E-01 |
| 387758 | FIBIN     | 33,542   | 9,683    | 39,702   | 13,933   | -1,140 | 1,87E-02 | 6,56E-01 |
| 79443  | FYCO1     | 149,892  | 54,222   | 195,532  | 80,983   | -1,141 | 4,28E-03 | 2,82E-01 |
| 10245  | TIMM17B   | 20,964   | 6,778    | 30,769   | 7,837    | -1,141 | 2,44E-02 | 7,44E-01 |
| 291    | SLC25A4   | 27,253   | 4,841    | 21,836   | 8,708    | -1,143 | 2,53E-02 | 7,57E-01 |
| 84171  | LOXL4     | 63,940   | 24,206   | 43,672   | 10,449   | -1,150 | 1,71E-02 | 6,26E-01 |
| 9223   | MAGI1     | 47,169   | 17,429   | 68,486   | 22,640   | -1,156 | 1,13E-02 | 5,17E-01 |
| 5137   | PDE1C     | 32,494   | 5,810    | 7,940    | 1,742    | -1,157 | 2,73E-02 | 7,84E-01 |
| 5828   | PEX2      | 42,976   | 15,492   | 66,501   | 21,770   | -1,157 | 1,23E-02 | 5,34E-01 |
| 54899  | PXK       | 41,928   | 14,524   | 65,508   | 21,770   | -1,158 | 1,27E-02 | 5,39E-01 |
| 23022  | PALLD     | 176,097  | 95,857   | 328,534  | 94,916   | -1,162 | 3,71E-03 | 2,64E-01 |
| 3306   | HSPA2     | 48,217   | 23,238   | 78,411   | 20,028   | -1,167 | 1,02E-02 | 4,90E-01 |
| 23371  | TNS2      | 107,964  | 28,079   | 70,471   | 36,573   | -1,168 | 7,94E-03 | 4,23E-01 |
| 5939   | RBMS2     | 77,567   | 24,206   | 74,441   | 30,478   | -1,174 | 7,04E-03 | 3,89E-01 |
| 2115   | ETV1      | 37,735   | 13,556   | 128,039  | 36,573   | -1,179 | 1,57E-02 | 6,00E-01 |
| 81848  | SPRY4     | 47,169   | 23,238   | 70,471   | 15,674   | -1,180 | 1,06E-02 | 4,99E-01 |
| 9260   | PDLIM7    | 227,459  | 98,762   | 423,818  | 140,197  | -1,207 | 2,48E-03 | 2,07E-01 |
| 2992   | GYG1      | 38,783   | 7,746    | 29,776   | 12,191   | -1,208 | 1,45E-02 | 5,73E-01 |
| 24139  | EML2      | 48,217   | 10,651   | 43,672   | 18,287   | -1,210 | 1,08E-02 | 5,04E-01 |
| 10507  | SEMA4D    | 17,819   | 1,937    | 8,933    | 1,742    | -1,217 | 1,97E-02 | 6,64E-01 |
| 55504  | TNFRSF19  | 202,302  | 120,064  | 303,720  | 49,635   | -1,218 | 5,30E-03 | 3,19E-01 |
| 27147  | DENND2A   | 71,277   | 15,492   | 34,739   | 17,416   | -1,218 | 1,11E-02 | 5,09E-01 |
| 10611  | PDLIM5    | 102,723  | 56,159   | 253,100  | 65,309   | -1,219 | 4,68E-03 | 2,97E-01 |
| 84189  | SLITRK6   | 19,916   | 2,905    | 9,925    | 1,742    | -1,221 | 1,97E-02 | 6,64E-01 |
| 57724  | EPG5      | 73,374   | 24,206   | 64,516   | 21,770   | -1,233 | 5,62E-03 | 3,28E-01 |
| 60     | ACTB      | 2728,460 | 1067,985 | 3786,574 | 1397,612 | -1,241 | 4,68E-04 | 6,40E-02 |
| 171024 | SYNPO2    | 29,350   | 24,206   | 111,165  | 13,933   | -1,241 | 1,16E-02 | 5,20E-01 |
| 1958   | EGR1      | 127,880  | 45,508   | 474,438  | 135,843  | -1,241 | 8,88E-03 | 4,53E-01 |
| 1902   | LPAR1     | 546,111  | 200,429  | 530,021  | 205,506  | -1,241 | 6,04E-04 | 7,65E-02 |

|        |          |         |         |          |         |        |          |          |
|--------|----------|---------|---------|----------|---------|--------|----------|----------|
| 64750  | SMURF2   | 165,615 | 36,794  | 138,957  | 70,534  | -1,242 | 3,18E-03 | 2,42E-01 |
| 7846   | TUBA1A   | 312,363 | 101,667 | 856,570  | 276,039 | -1,247 | 5,66E-03 | 3,28E-01 |
| 64221  | ROBO3    | 28,301  | 9,683   | 52,605   | 13,062  | -1,252 | 1,02E-02 | 4,90E-01 |
| 154796 | AMOT     | 32,494  | 20,333  | 155,830  | 31,348  | -1,254 | 1,04E-02 | 4,93E-01 |
| 112574 | SNX18    | 150,941 | 45,508  | 199,502  | 77,500  | -1,258 | 1,98E-03 | 1,75E-01 |
| 147495 | APCDD1   | 78,615  | 38,730  | 198,510  | 49,635  | -1,271 | 3,99E-03 | 2,75E-01 |
| 8507   | ENC1     | 62,892  | 25,175  | 75,434   | 18,287  | -1,279 | 4,36E-03 | 2,84E-01 |
| 23677  | SH3BP4   | 137,314 | 53,254  | 157,815  | 48,764  | -1,279 | 1,42E-03 | 1,44E-01 |
| 4329   | ALDH6A1  | 13,627  | 3,873   | 25,806   | 3,483   | -1,280 | 1,41E-02 | 5,70E-01 |
| 54328  | GPR173   | 12,578  | 3,873   | 24,814   | 2,612   | -1,282 | 1,42E-02 | 5,72E-01 |
| 6869   | TACR1    | 30,398  | 5,810   | 12,903   | 1,742   | -1,289 | 1,38E-02 | 5,64E-01 |
| 57761  | TRIB3    | 56,603  | 9,683   | 25,806   | 12,191  | -1,293 | 9,08E-03 | 4,57E-01 |
| 92154  | MTSS1L   | 235,845 | 93,921  | 247,145  | 73,146  | -1,298 | 8,49E-04 | 9,74E-02 |
| 5393   | EXOSC9   | 15,723  | 2,905   | 26,799   | 5,225   | -1,305 | 1,21E-02 | 5,31E-01 |
| 9742   | IFT140   | 63,940  | 16,460  | 61,538   | 21,770  | -1,315 | 3,61E-03 | 2,62E-01 |
| 2491   | CENPI    | 8,386   | 1,937   | 19,851   | 0,000   | -1,316 | 1,15E-02 | 5,20E-01 |
| 4857   | NOVA1    | 20,964  | 1,937   | 18,858   | 5,225   | -1,318 | 1,16E-02 | 5,20E-01 |
| 116832 | RPL39L   | 19,916  | 3,873   | 27,791   | 6,096   | -1,322 | 1,02E-02 | 4,90E-01 |
| 9241   | NOG      | 12,578  | 0,000   | 13,896   | 1,742   | -1,328 | 1,08E-02 | 5,04E-01 |
| 2250   | FGF5     | 32,494  | 14,524  | 134,987  | 27,865  | -1,332 | 6,57E-03 | 3,69E-01 |
| 323    | APBB2    | 31,446  | 11,619  | 39,702   | 5,225   | -1,343 | 7,17E-03 | 3,92E-01 |
| 26230  | TIAM2    | 25,157  | 3,873   | 20,844   | 5,225   | -1,353 | 8,72E-03 | 4,50E-01 |
| 4008   | LMO7     | 109,013 | 82,302  | 459,550  | 74,017  | -1,354 | 3,35E-03 | 2,51E-01 |
| 10641  | NPRL2    | 20,964  | 0,000   | 12,903   | 3,483   | -1,359 | 9,49E-03 | 4,73E-01 |
| 6218   | RPS17    | 32,494  | 3,873   | 77,419   | 20,899  | -1,360 | 7,09E-03 | 3,90E-01 |
| 64900  | LPIN3    | 27,253  | 9,683   | 43,672   | 6,966   | -1,369 | 5,81E-03 | 3,36E-01 |
| 158056 | MAMDC4   | 33,542  | 7,746   | 36,724   | 8,708   | -1,405 | 4,35E-03 | 2,84E-01 |
| 9020   | MAP3K14  | 22,012  | 5,810   | 25,806   | 2,612   | -1,411 | 6,41E-03 | 3,62E-01 |
| 1265   | CNN2     | 272,532 | 103,603 | 671,956  | 174,157 | -1,414 | 8,14E-04 | 9,61E-02 |
| 9659   | PDE4DIP  | 101,675 | 27,111  | 78,411   | 24,382  | -1,427 | 1,10E-03 | 1,19E-01 |
| 5924   | RASGRF2  | 56,603  | 19,365  | 76,426   | 16,545  | -1,429 | 1,58E-03 | 1,52E-01 |
| 9760   | TOX      | 6,289   | 0,000   | 23,821   | 0,000   | -1,435 | 5,66E-03 | 3,28E-01 |
| 22874  | PLEKHA6  | 42,976  | 10,651  | 30,769   | 5,225   | -1,435 | 4,11E-03 | 2,76E-01 |
| 25959  | KANK2    | 361,628 | 121,032 | 517,118  | 155,000 | -1,442 | 1,14E-04 | 2,10E-02 |
| 9079   | LDB2     | 33,542  | 12,587  | 59,553   | 8,708   | -1,458 | 2,63E-03 | 2,13E-01 |
| 347902 | AMIGO2   | 11,530  | 3,873   | 72,456   | 8,708   | -1,493 | 4,05E-03 | 2,75E-01 |
| 84962  | AJUBA    | 42,976  | 4,841   | 63,523   | 17,416  | -1,531 | 1,80E-03 | 1,66E-01 |
| 57608  | KIAA1462 | 281,965 | 106,508 | 320,593  | 54,860  | -1,540 | 1,98E-04 | 3,33E-02 |
| 79633  | FAT4     | 129,977 | 25,175  | 93,300   | 33,090  | -1,553 | 3,15E-04 | 4,76E-02 |
| 3790   | KCNS3    | 12,578  | 1,937   | 31,762   | 2,612   | -1,603 | 2,18E-03 | 1,88E-01 |
| 23566  | LPAR3    | 16,771  | 0,000   | 17,866   | 1,742   | -1,609 | 2,13E-03 | 1,86E-01 |
| 2353   | FOS      | 18,868  | 13,556  | 204,465  | 19,157  | -1,621 | 1,56E-03 | 1,52E-01 |
| 54510  | PCDH18   | 805,016 | 140,397 | 871,458  | 304,775 | -1,623 | 4,21E-05 | 9,61E-03 |
| 22861  | NLRP1    | 27,253  | 4,841   | 25,806   | 1,742   | -1,663 | 1,31E-03 | 1,35E-01 |
| 27123  | DKK2     | 27,253  | 3,873   | 39,702   | 6,096   | -1,700 | 7,60E-04 | 9,29E-02 |
| 10129  | FRY      | 6,289   | 0,000   | 38,709   | 0,000   | -1,718 | 1,00E-03 | 1,13E-01 |
| 79094  | CHAC1    | 27,253  | 0,968   | 13,896   | 1,742   | -1,754 | 8,14E-04 | 9,61E-02 |
| 113146 | AHNAK2   | 32,494  | 1,937   | 49,627   | 8,708   | -1,808 | 3,56E-04 | 5,18E-02 |
| 10290  | SPEG     | 116,350 | 16,460  | 150,867  | 37,444  | -1,814 | 3,30E-05 | 8,08E-03 |
| 55784  | MCTP2    | 73,374  | 20,333  | 146,897  | 21,770  | -1,825 | 3,92E-05 | 9,15E-03 |
| 79640  | C22ORF46 | 35,639  | 5,810   | 36,724   | 2,612   | -1,888 | 1,90E-04 | 3,30E-02 |
| 4739   | NEDD9    | 10,482  | 0,000   | 46,650   | 0,871   | -2,032 | 1,06E-04 | 1,97E-02 |
| 89795  | NAV3     | 105,868 | 8,714   | 42,680   | 8,708   | -2,110 | 1,45E-05 | 4,03E-03 |
| 64283  | ARHGEF28 | 34,591  | 5,810   | 64,516   | 1,742   | -2,238 | 8,84E-06 | 2,68E-03 |
| 652    | BMP4     | 63,940  | 6,778   | 69,478   | 5,225   | -2,421 | 3,30E-07 | 1,54E-04 |
| 1490   | CTGF     | 170,856 | 52,286  | 1006,445 | 16,545  | -2,599 | 1,55E-07 | 8,39E-05 |
| 3491   | CYR61    | 684,473 | 16,460  | 1222,820 | 8,708   | -4,862 | 3,86E-31 | 3,97E-27 |
